# Supplementary material for: Enhanced high-rate capability and high voltage cycleability of Li2TiO3-coated LiNi0.5Co0.2Mn0.3O2 cathode materials
Source: Royal Society of Chemistry journal article supplement (doi:10.1039/c6ra20035d), 2016-01-01
Supplement: c6ra20035d1.pdf [file c6ra20035d1.pdf]

supplementary information

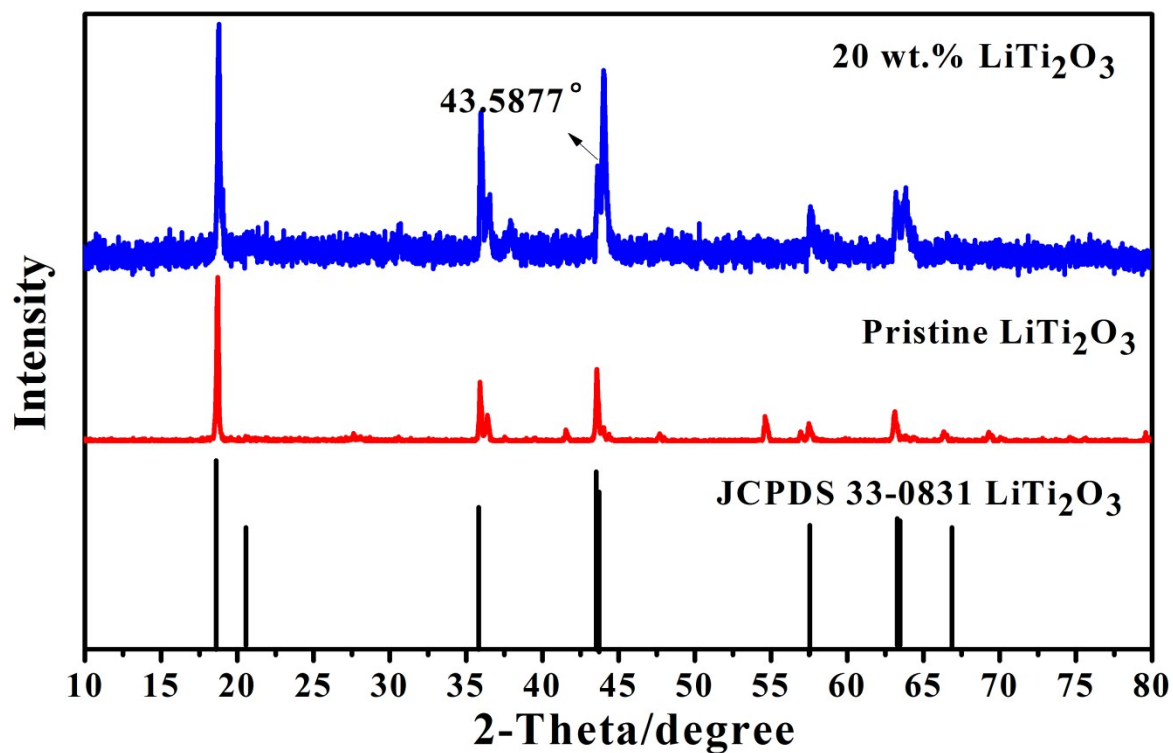

Fig. S1 XRD patterns of the pristine  $\text{Li}_2\text{TiO}_3$  and 20 wt.%  $\text{LiTi}_2\text{O}_3$ -modified  $\text{LiNi}_{0.5}\text{Co}_{0.2}\text{Mn}_{0.3}\text{O}_2$  sample.

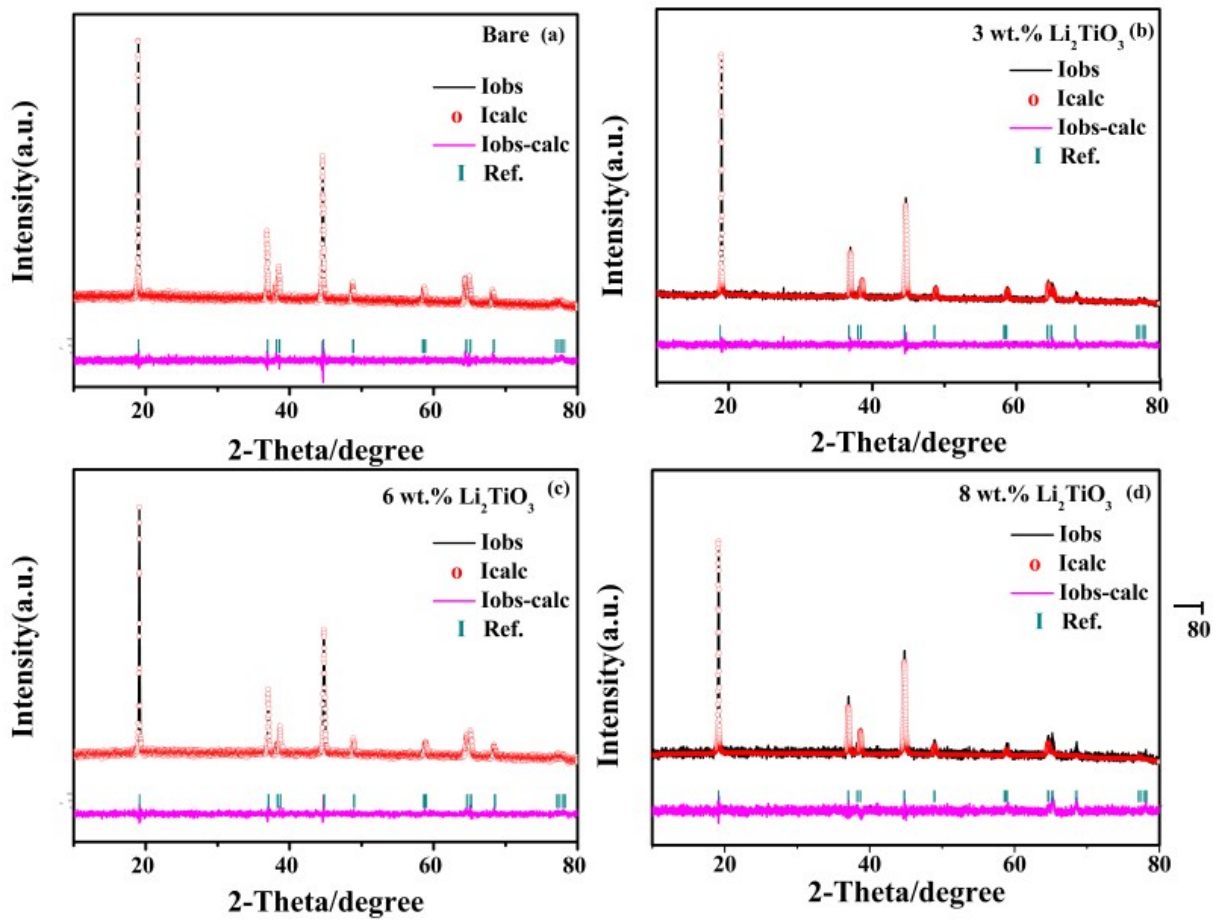

Fig. S2 Rietveld refinement results (a-d) of the pristine and  $\text{Li}_2\text{TiO}_3$ -modified  $\text{LiNi}_{0.5}\text{Co}_{0.2}\text{Mn}_{0.3}\text{O}_2$  samples.

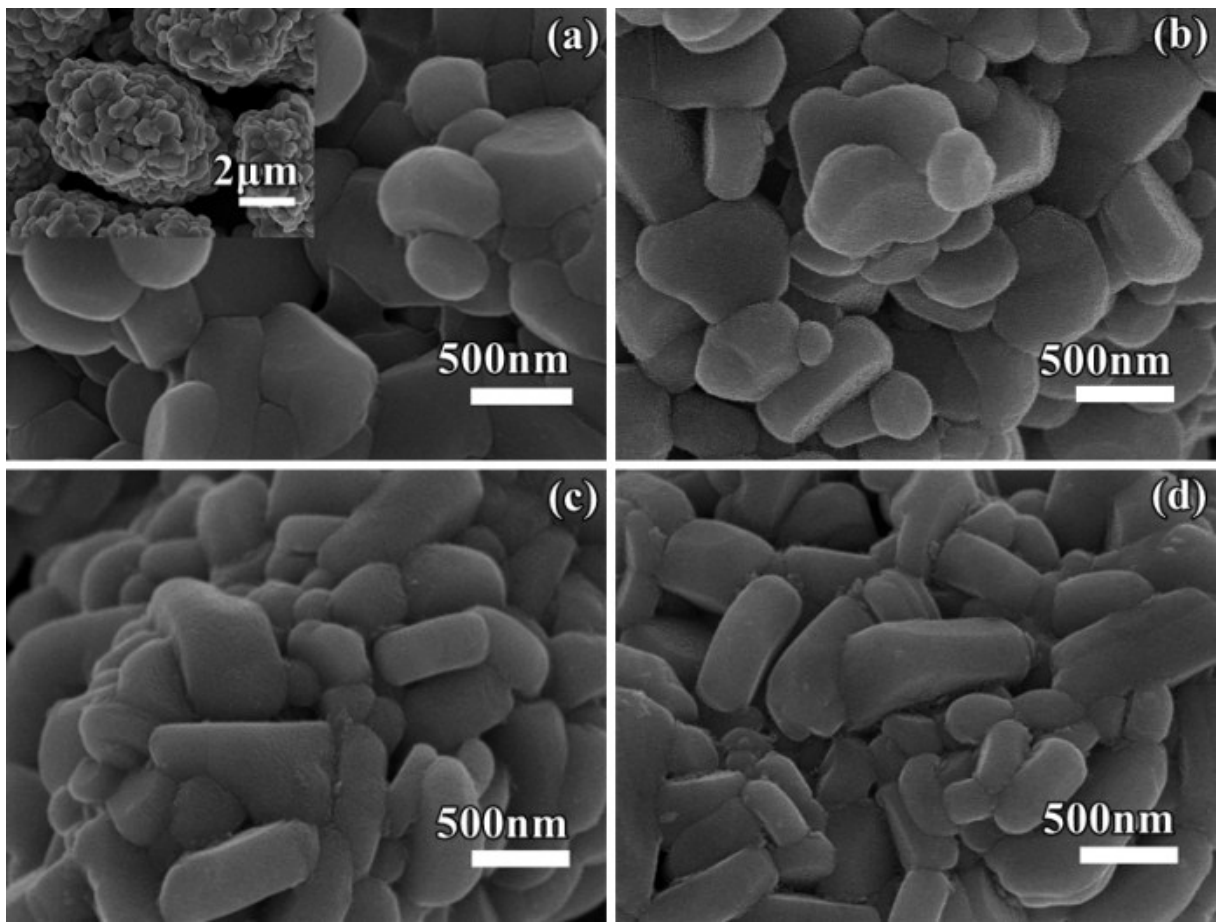

**Fig. S3** SEM images of the bare  $\text{LiNi}_{0.5}\text{Co}_{0.2}\text{Mn}_{0.3}\text{O}_2$  sample (a); 3 wt.% (b), 6 wt.% (c) and (d) 8 wt.%  $\text{Li}_2\text{TiO}_3$ -modified  $\text{LiNi}_{0.5}\text{Co}_{0.2}\text{Mn}_{0.3}\text{O}_2$  samples.

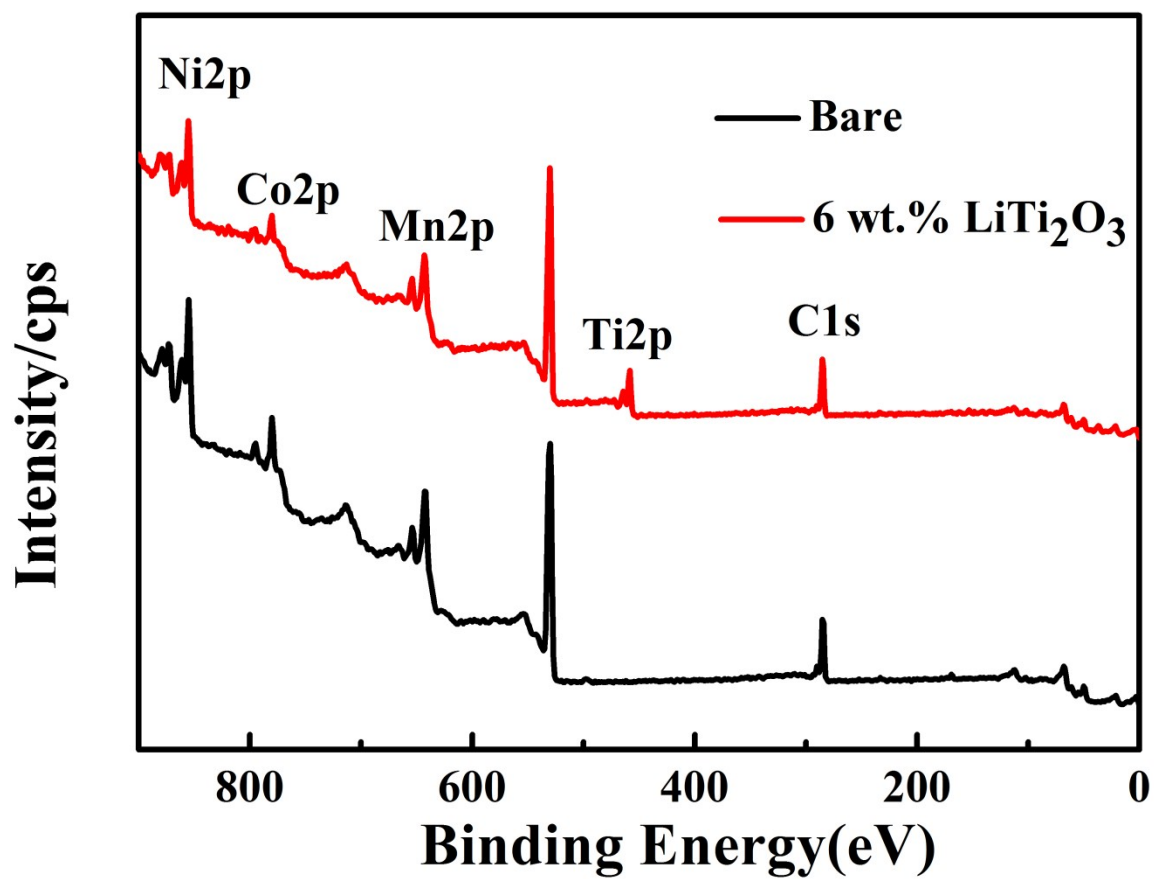

Fig. S4. XPS wide-scan spectra of the bare and 6 wt.% Li<sub>2</sub>TiO<sub>3</sub>-modified LiNi<sub>0.5</sub>Co<sub>0.2</sub>Mn<sub>0.3</sub>O<sub>2</sub> sample.

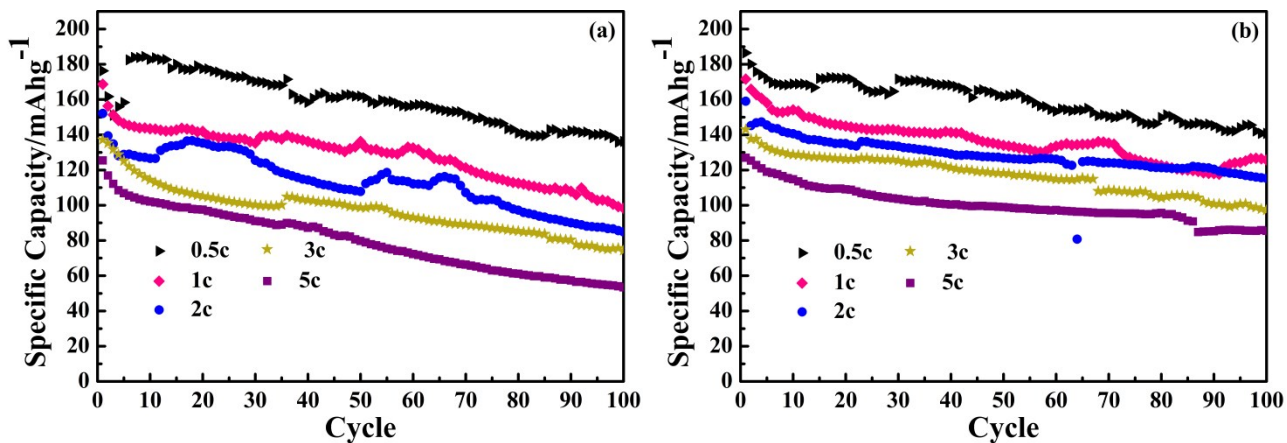

Fig. S5 Cycleability of the  $\text{LiNi}_{0.5}\text{Co}_{0.2}\text{Mn}_{0.3}\text{O}_2$  (a) and 6 wt.%  $\text{Li}_2\text{TiO}_3$ -modified  $\text{LiNi}_{0.5}\text{Co}_{0.2}\text{Mn}_{0.3}\text{O}_2$  sample (b) between 2.8-4.6 V at 25 °C

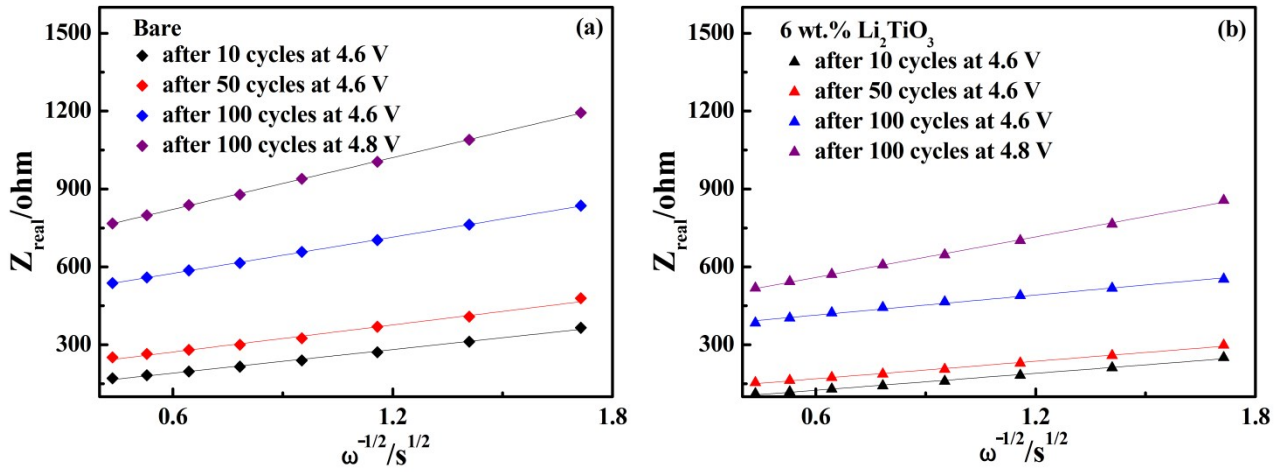

Fig. S6 the plots of  $Z_{\text{real}}$  as a function of  $\omega^{-1/2}$  of the (a)  $\text{LiNi}_{0.5}\text{Co}_{0.2}\text{Mn}_{0.3}\text{O}_2$  and (a) 6 wt.%  $\text{Li}_2\text{TiO}_3$ -modified  $\text{LiNi}_{0.5}\text{Co}_{0.2}\text{Mn}_{0.3}\text{O}_2$  sample.
